# Supplementary material for: Transcriptome Signatures Predict Phenotypic Variations of Candida auris
Source: Front Cell Infect Microbiol. 2021 Apr 14;11:662563. doi: 10.3389/fcimb.2021.662563 (PMC8079977; doi:10.3389/fcimb.2021.662563)
Supplement: Supplementary file 3 [file Table_2.xlsx]

## Sheet: Sheet1
Supplementary Table 2: Oligos used in this study
Name	Sequence (5'->3')	Usage
5M_A1	ccgctgctaggcgcgccgtgCGCCTAAGACCGGATAAAGCcgtacgctgcaggtcgac	Amplification of the NAT1 marker from pTS50
3M_A2	gcagggatgcggccgctgacGGGCTCGAGATTTAAACGGCctacgagaccgacaccg	Amplification of the NAT1 marker from pTS50
55_CaurCDR1	GAATCTGTAAGCTAAAAGCACC	Amplification of the CDR1 upstream region from C. auris gDNA
53_CaurCDR1	cacggcgcgcctagcagcggCTCTAATTTCACCTTCCTGATG	Amplification of the CDR1 upstream region from C. auris gDNA
35_CaurCDR1	gtcagcggccgcatccctgcATCTTCCAAGTCTAAAAACCAC	Amplification of the CDR1 downstream region from C. auris gDNA
33_CaurCDR1	AGACCAACTTCATCTCTCTACG	Amplification of the CDR1 downstream region from C. auris gDNA
5C_CaurCDR1	AGTAATCATGAGGCAGACTAGC	Integration check of the CDR1 deletion cassette
3C_CaurCDR1	TGATATGACAGTCAACTTGTCG	Integration check of the CDR1 deletion cassette
hk2	CGTCAAGACTGTCAAGGAGGG	Integration check of the CDR1 deletion cassette
hk3	CATCATCTGCCCAGATGCGAAG	Integration check of the CDR1 deletion cassette
CDR1_LOG_fwd	TGTGTATGTCCCACATGTTTAG	Validation of CDR1 deletion
CDR1_LOG_rev	ATTCACATATTCAAAGGAGGTC	Validation of CDR1 deletion
